# Supplementary material for: A Mutation Identified in Neonatal Microcephaly Destabilizes Zika Virus NS1 Assembly in Vitro
Source: PubMed Central journal article supplement (PMC5309781; doi:10.1038/srep42580), 2017-02-15
Supplement: srep42580-s1.pdf [file srep42580-s1.pdf]

# **A Mutation identified in Neonatal Microcephaly Destabilizes Zika Virus NS1 Assembly *in vitro***

**Deping Wang,<sup>1,+</sup> Cheng Chen,<sup>1,2,+</sup> Shengnan Liu,<sup>1,+</sup> Han Zhou,<sup>1,+</sup> Kailin Yang,<sup>3</sup>  
Qi Zhao,<sup>4</sup> Xiaoyun Ji,<sup>4</sup> Chen Chen,<sup>1</sup> Wei Xie,<sup>1</sup> Zefang Wang,<sup>1,2</sup> Li-Zhi Mi<sup>1,\*</sup>,  
Haitao Yang<sup>1,2,\*</sup>**

<sup>1</sup>School of Life Sciences, Tianjin University, Tianjin 300072, People's Republic of  
China

<sup>2</sup>Tianjin International Joint Academy of Biotechnology and Medicine, Tianjin  
300457, People's Republic of China

<sup>3</sup>Cleveland Clinic Lerner College of Medicine of Case Western Reserve University,  
Cleveland, OH 44195, USA

<sup>4</sup>Department of Molecular Biophysics and Biochemistry, Yale University, New  
Haven, CT 06520, USA

<sup>+</sup>These authors contributed equally to this work.

<sup>\*</sup>Correspondence: yanght@tju.edu.cn, lizhi.mi@tju.edu.cn

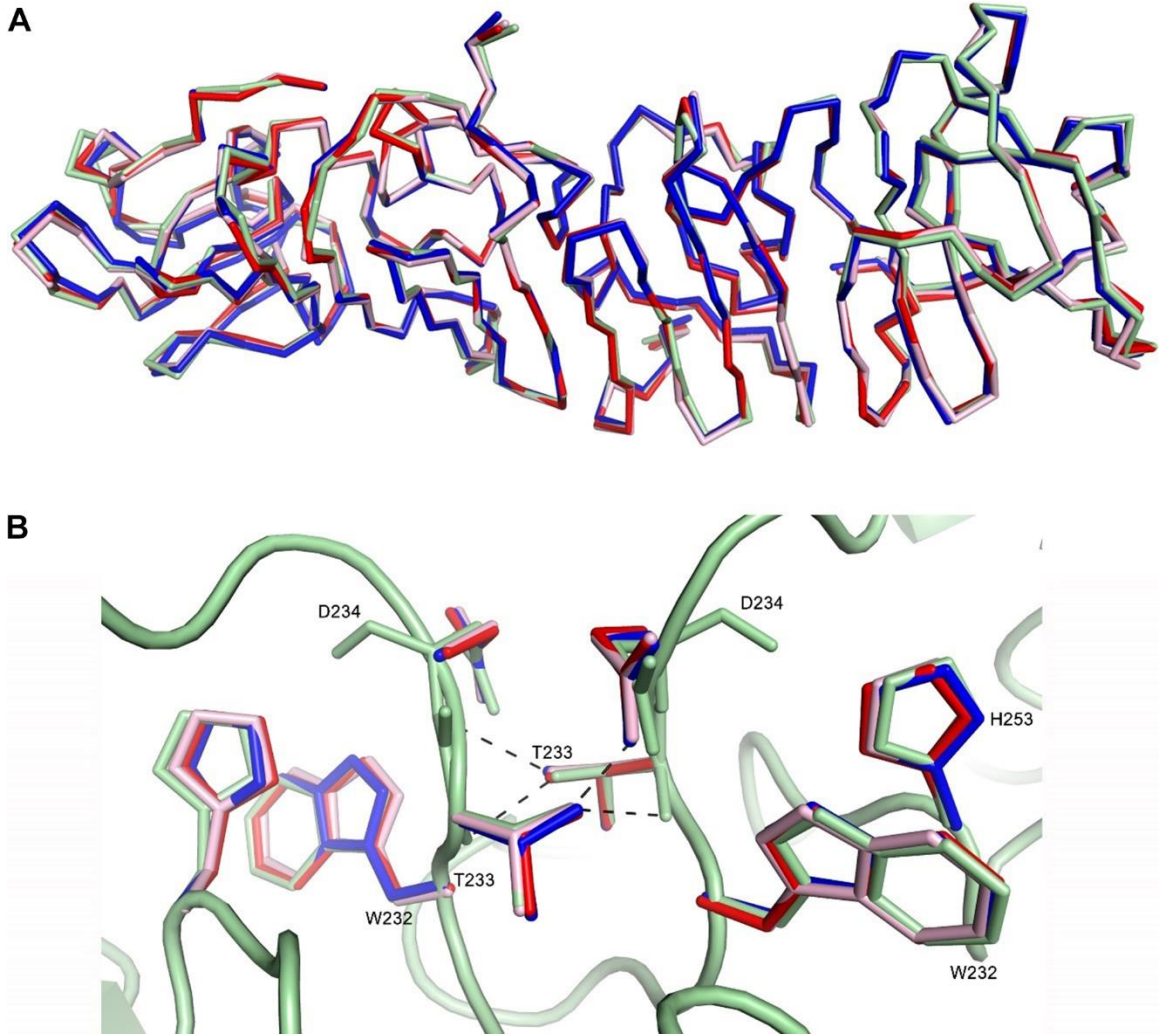

**Supplementary Figure 1. Comparison of the C-terminal structures from ZIKV NS1.**

(A) The overlay of the main chain of four ZIKV NS1 C-terminal structures. The Suriname strain in green; PDB code: 5GS6 in red, PDB code: 5IY3 in blue, PDB code: 5K6K in pink<sup>1,2,3</sup>.

(B) T233 plays a pivotal role in organizing a hydrogen-bonding network across the dimer interface among all ZIKV NS1 structures. The hydrogen bonds are shown in dash line.

**Supplementary Table 1. Data collection and refinement statistics**

| NS1 <sub>172-352</sub>                                           |                                      |
|------------------------------------------------------------------|--------------------------------------|
| <b>Data Collection</b>                                           |                                      |
| X-ray Source                                                     | SSRF beamline BL19U1                 |
| Wavelength (Å)                                                   | 0.97853 Å                            |
| Space group                                                      | C222 <sub>1</sub>                    |
| Unit cell a,b,c,α,β,γ (Å)                                        | 63.9, 100.8, 110.7, 90.0, 90.0, 90.0 |
| Resolution range (Å)                                             | 50.0-2.80 (2.88-2.80) <sup>a</sup>   |
| Unique reflections                                               | 8937 (705) <sup>a</sup>              |
| Completeness (%)                                                 | 99.4 (96.4) <sup>a</sup>             |
| Redundancy                                                       | 12.0 (9.6) <sup>a</sup>              |
| <i>I</i> / $\sigma$ <i>I</i>                                     | 15.9 (2.8) <sup>a</sup>              |
| <i>R</i> <sub>merge</sub> <sup>b</sup>                           | 0.134 (0.653) <sup>a</sup>           |
| <b>Refinement</b>                                                |                                      |
| Resolution range (Å)                                             | 37.27-2.82                           |
| No. of reflections (working/test)                                | 7756/790                             |
| <i>R</i> <sub>work</sub> / <i>R</i> <sub>free</sub> <sup>c</sup> | 0.210/0.259 (0.221/0.322)            |
| Number of atoms                                                  |                                      |
| Protein/water                                                    | 2810/4                               |
| B-factors                                                        |                                      |
| Protein                                                          | 54.7                                 |
| Water                                                            | 20.3                                 |
| r.m.s. deviations                                                |                                      |
| Bond lengths (Å)                                                 | 0.004                                |
| Bond angles (°)                                                  | 0.69                                 |
| Ramachandran Plot <sup>d</sup>                                   |                                      |
| (% favored/allowed/outliers)                                     | 95/5/0                               |
| Rotamer Outliers (%) <sup>d</sup>                                | 0.64                                 |
| Clashscore <sup>d</sup>                                          | 6.88                                 |

<sup>a</sup> Values in parentheses are the statistics for the highest resolution shell.

<sup>b</sup>  $R_{\text{merge}} = \frac{\sum_{\text{hkl}} \sum_j |\mathbf{I}_{\text{hkl}} - \mathbf{I}_{\text{hkl}}(j)|}{\sum_{\text{hkl}} \sum_j \mathbf{I}_{\text{hkl}}(j)}$ .  $\mathbf{I}_{\text{hkl}}(j)$  and  $\mathbf{I}_{\text{hkl}}$  represent the *j*th and mean intensity of reflection *hkl*.

<sup>c</sup>  $R_{\text{work}} = \frac{\sum_{\text{hkl}} (|\mathbf{F}_{\text{obs}}| - |\mathbf{F}_{\text{calc}}|)}{|\mathbf{F}_{\text{obs}}|}$ .  $\mathbf{F}_{\text{obs}}$  and  $\mathbf{F}_{\text{calc}}$  represent the observed and calculated structure factors, respectively. *R*<sub>free</sub> is the R factor calculated with 10 % of unique reflections as the test set.

<sup>d</sup> The values are reported by PHENIX.

## References

- 1 Xu X. *et al.* Contribution of intertwined loop to membrane association revealed by Zika virus full length NS1 structure. *EMBO J* **35**, 2170-2178 (2016), doi: 10.15252/emj.201695290.
- 2 Brown W.C. *et al.* Extended surface for membrane association in Zika virus NS1 structure. *Nat. Struct Mol Biol* **23**, 865-867 (2016), doi: 10.1038/nsmb.3268.
- 3 Song, H., Qi, J., Haywood, J., Shi, Y. & Gao, G. F. Zika virus NS1 structure reveals diversity of electrostatic surfaces among flaviviruses. *Nat Struct Mol Biol* **23**, 456-458 (2016), doi: 10.1038/nsmb.3213.
